# Supplementary material
Source: Elsevier journal article supplement (https://www.sciencedirect.com/science/article/pii/S2530016418302155)
Supplement: mmc1 [file S2530016418302155:mmc1.doc]

Additional table (not numbered in the text)

| **Main findings of the SLR:** | **Recommendations to complement the current evidence/ areas of improvements for future observational studies** |
| --- | --- |
| - The most common research design was a retrospective longitudinal study based on secondary data use. | - Conduct prospective and cross-sectional studies to complement the available evidence with those variables not systematically collected in the patient medical history. |
| - Effectiveness studies mainly focused on glycemic control. | - Complement the effectiveness variables besides glycemic control, including patient reported outcomes (PROs), adherence, persistence, health resource utilization, predictors of response, etc. |
| - Few studies assessed the safety profile of the therapies. Only hypoglycemia episodes used to be collected (acute complications). | - Complement hypoglycemia data with the collection of long-term complications. |
| - The targeted population included in these studies was generally adult T2DM patients. | - Study of specific subpopulations (e.g., elderly or with key comorbidities) and predictors of response. |
| - Few studies included comparative data between treatments and statistical analysis were mostly descriptive. | - Comparative effectiveness data and advanced statistical techniques to adjust for any confounding factors/ bias. |
| - The representativeness of the results obtained were limited in some cases, due to the studies were conducted only in some hospital/regions. | - National and multinational initiatives can increase the representativeness of the results. |
| - Disclosures about founding sources, authors´ conflict of interests and approval of the study were missing in some studies. | - A correct disclosure of the founding sources, authors´ conflict of interests and approval of the study is essential to increase the transparency and the quality of studies. |
